# Supplementary material for: Targeted modification of the Per2 clock gene alters circadian function in mPer2luciferase (mPer2Luc) mice
Source: PubMed Central journal article supplement (PMC8191895; doi:10.1371/journal.pcbi.1008987), 2021-05-28

DD →

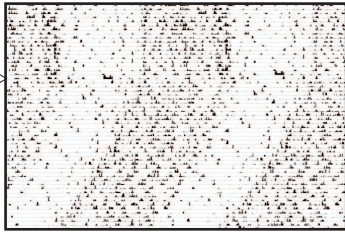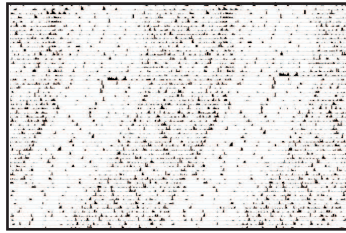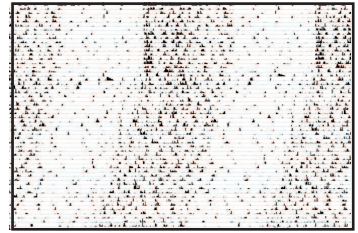

DD →

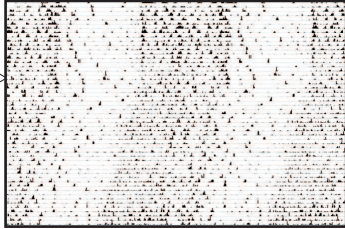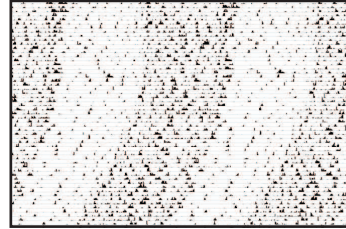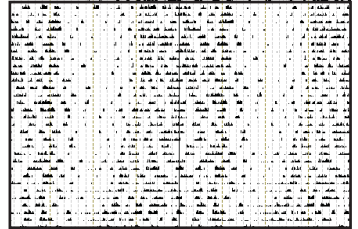

DD →

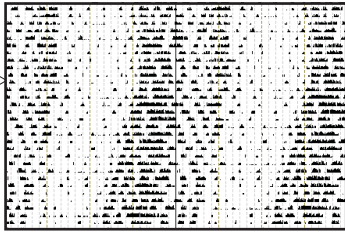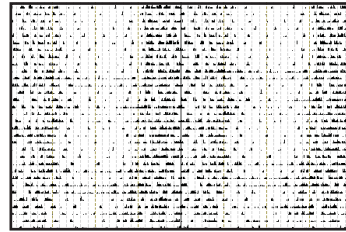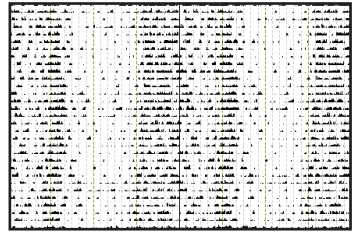

DD →

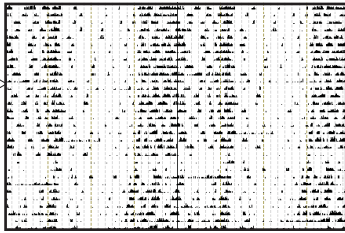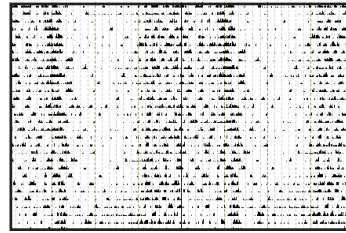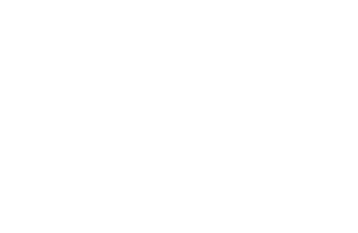

Supplement: pcbi.1008987.s001.pdf [file pcbi.1008987.s001.pdf]
