# Supplementary material for: Targeted modification of the Per2 clock gene alters circadian function in mPer2luciferase (mPer2Luc) mice
Source: PubMed Central journal article supplement (PMC8191895; doi:10.1371/journal.pcbi.1008987), 2021-05-28
Supplement: pcbi.1008987.s012.pdf [file pcbi.1008987.s012.pdf]

## Supplementary Table 1

### Sensitivity of the model to alteration of individual parameters at the baseline period of 23.8 hours

| parameter | description                                                                         | classification  | relative sensitivity<br>of period* |
|-----------|-------------------------------------------------------------------------------------|-----------------|------------------------------------|
| umPt      | degradation rate constant for Per2                                                  | Degradation     | -0.254                             |
| unbin     | normalized binding rate constant for BMAL-CLOCK/NPAS2 to Per1/2/Cry1 E-box          | Association     | -0.223                             |
| Ct        | total CK1 concentration                                                             | Phosphorylation | -0.152                             |
| ac        | binding rate constant for PER1/2 to CK1 $\epsilon/\delta$                           | Phosphorylation | -0.125                             |
| hto       | CK1 $\epsilon/\delta$ phosphorylation rate constant for PER2                        | Phosphorylation | -0.103                             |
| ubc       | degradation rate constant for BMAL-CLOCK/NPAS2                                      | Degradation     | -0.096                             |
| nl        | nuclear localization rate constant for proteins bound to PER                        | Translocation   | -0.096                             |
| umRt      | degradation rate constant for Cry2                                                  | Degradation     | 0.089                              |
| up        | degradation rate constant for CKI phosphorylated PER                                | Degradation     | 0.082                              |
| trRt      | transcription rate constant for Cry2                                                | Production      | -0.05                              |
| tIr       | translation rate constant for CRY1 and CRY2                                         | Production      | -0.047                             |
| umB       | degradation rate constant for Bmal1                                                 | Degradation     | -0.047                             |
| dr        | unbinding rate constant for PER1/2 to CRY1/2                                        | Association     | -0.044                             |
| trgto     | increase rate of GSK3 $\beta$ activity                                              | Phosphorylation | 0.044                              |
| urt       | degradation rate constant for Cry2                                                  | Degradation     | 0.044                              |
| ugto      | decrease rate of GSK3 $\beta$ activity                                              | Phosphorylation | -0.043                             |
| tlc       | translation rate constant for CLOCK                                                 | Production      | -0.043                             |
| ar        | binding rate constant for PER1/2 to CRY1/2                                          | Association     | -0.041                             |
| tmc       | rate constant for folding and nuclear export of Per1/2, Cry1/2, Bmal and Npas2 mRNA | Translocation   | -0.037                             |
| hoo       | CK1 $\epsilon/\delta$ phosphorylation rate constant for PER1                        | Phosphorylation | -0.03                              |
| uro       | degradation rate constant for CRY1                                                  | Degradation     | -0.028                             |
| Nf        | ratio of nuclear to cytoplasmic compartment volume                                  | Translocation   | -0.026                             |
| phos      | phosphorylation rate constant for BMAL-CLOCK/NPAS2                                  | Phosphorylation | -0.022                             |
| trPt      | transcription rate constant for of Per2                                             | Production      | 0.021                              |
| tIp       | translation rate constant for PER1 and PER2                                         | Production      | 0.021                              |
| us        | clearance rate of cAMP and activated CREB                                           | Degradation     | -0.021                             |
| umPo      | degradation rate constant for Per1                                                  | Degradation     | -0.018                             |
| unbinrev  | normalized unbinding rate constant for REV-ERBs to Cry1/Npas2 RORE                  | Association     | 0.016                              |
| tIrev     | translation rate constant for REV-ERBs                                              | Production      | -0.016                             |
| urev      | degradation rate constant for unphosphorylated REV-ERBs                             | Degradation     | 0.016                              |
| cbin      | binding rate constant for BMAL to CLOCK/NPAS2                                       | Association     | -0.015                             |
| binrev    | normalized binding rate constant for REV-ERBs to Cry1/Npas2 RORE                    | Association     | -0.015                             |

## Supplementary Table 1

|           |                                                                                                |                  |        |
|-----------|------------------------------------------------------------------------------------------------|------------------|--------|
| umRev     | degradation rate constant for Rev-Erbs                                                         | Degradation      | 0.015  |
| uncbin    | unbinding rate constant for BMAL to CLOCK/NPAS2                                                | Association      | 0.015  |
| trRev     | transcription rate constant for Rev-Erbs                                                       | Production       | -0.014 |
| uc        | degradation rate constant for CLOCK/NPAS2                                                      | Degradation      | 0.013  |
| ag        | binding rate constant for REV-ERBs to GSK3 $\beta$                                             | Phosphorylation  | 0.012  |
| cbbin     | binding rate constant for CRY1/2 to BMAL-CLOCK/NPAS2 in the nucleus                            | Association      | -0.012 |
| tlb       | translation rate constant for BMAL                                                             | Production       | 0.011  |
| Ek        | potassium reversal potential                                                                   | Voltage Dynamics | -0.011 |
| trB       | transcription rate constant for Bmal                                                           | Production       | 0.01   |
| dc        | unbinding rate constant for PER1/2 to CKI $\epsilon/\delta$                                    | Phosphorylation  | 0.01   |
| ts        | clearance time constant for shell calcium                                                      | Calcium Dynamics | -0.009 |
| lne       | nuclear export rate constant for unbound kinases GSK3 $\beta$ and CKI                          | Translocation    | 0.008  |
| trPo      | transcription rate constant for Per1                                                           | Production       | -0.007 |
| CtrPt     | transcription rate of Per2 from CRE activation                                                 | Production       | 0.007  |
| ks        | conversion factor between calcium current and shell calcium concentration                      | Calcium Dynamics | -0.007 |
| tc        | clearance time constant for cytosolic calcium                                                  | Calcium Dynamics | 0.007  |
| upu       | degradation rate constant for unphosphorylated PER                                             | Degradation      | -0.007 |
| dg        | unbinding rate constant for PER2/REV-ERBs to GSK3 $\beta$                                      | Phosphorylation  | -0.006 |
| unsbin    | rate constant for activated CREB unbinding from CRE site                                       | Coupling         | -0.006 |
| bbin      | binding rate constant for PER1/2 to BMAL-CLOCK/NPAS2 in the nucleus                            | Association      | -0.006 |
| binrevb   | normalized binding rate constant for REV-ERBs to Bmal RORE                                     | Association      | -0.006 |
| trRo      | transcription rate constant for of Cry1                                                        | Production       | 0.005  |
| clk       | the strength of the influence of the molecular clock on the electrical activity of SCN neurons | Voltage Dynamics | 0.005  |
| uncbbin   | unbinding rate constant for CRY1/2 to BMAL-CLOCK/NPAS2 in the nucleus                          | Association      | 0.005  |
| unbinrevb | normalized unbinding rate constant for REV-ERBs to Bmal RORE                                   | Association      | 0.005  |
| unbinc    | normalized unbinding rate constant for BMAL-CLOCK/NPAS2 to Cry2 E-box                          | Association      | -0.004 |
| umNp      | degradation rate constant for Npas2                                                            | Degradation      | 0.004  |
| Eca       | calcium reversal potential                                                                     | Voltage Dynamics | -0.004 |
| sbin      | rate constant for activated CREB binding to CRE site on DNA                                    | Coupling         | 0.003  |
| kc        | conversion factor between calcium current and cytosolic calcium concentration                  | Calcium Dynamics | 0.003  |
| nlrev     | nuclear localization rate constant for REV-ERBs as well as GSK3 $\beta$ if bound               | Translocation    | -0.003 |
| Ena       | sodium reversal potential                                                                      | Voltage Dynamics | 0.003  |
| K2        | sigmoid parameter for inactivation of L-type calcium channels                                  | Calcium Dynamics | 0.003  |
| uprev     | degradation rate constant for GSK3 $\beta$ phosphorylated REV-ERBs                             | Degradation      | 0.002  |
| ub        | degradation rate constant for Bmal                                                             | Degradation      | -0.002 |
| umRo      | degradation rate constant for Cry1                                                             | Degradation      | -0.002 |
| bs        | basal release rate of shell calcium                                                            | Calcium Dynamics | -0.002 |

### Supplementary Table 1

|         |                                                                                                               |                  |        |
|---------|---------------------------------------------------------------------------------------------------------------|------------------|--------|
| gna     | maximum sodium conductance                                                                                    | Voltage Dynamics | -0.002 |
| taurl   | time constant of L-type calcium channels                                                                      | Calcium Dynamics | -0.002 |
| gcanl   | maximum conductance of non-L-type calcium channels                                                            | Voltage Dynamics | -0.002 |
| nlbc    | nuclear localization rate constant for BMAL-CLOCK/NPAS2                                                       | Translocation    | -0.002 |
| tmcrev  | rate constant for folding and nuclear export of Rev-Erbs mRNA                                                 | Translocation    | -0.001 |
| trNp    | transcription rate constant for Npas2                                                                         | Production       | -0.001 |
| K1      | sigmoid parameter for inactivation of L-type calcium channels                                                 | Calcium Dynamics | 0.001  |
| uv      | degradation rate of VIP                                                                                       | Degradation      | -0.001 |
| CtrPo   | transcription rate of Per1 from CRE activation                                                                | Production       | -0.001 |
| uncvbin | rate constant for CRY1/CRY2 unbinding from VPAC2R                                                             | Coupling         | -0.001 |
| gk      | maximum potassium conductance                                                                                 | Voltage Dynamics | 0.001  |
| unbbin  | unbinding rate constant for PER1/2 to BMAL-CLOCK/NPAS2 in the nucleus                                         | Association      | -0.001 |
| cvbin   | rate constant for CRY1/CRY2 binding to VPAC2R                                                                 | Coupling         | -0.001 |
| vbin    | rate constant for VIP binding to VPAC2R                                                                       | Coupling         | 0.001  |
| unbinr  | normalized unbinding rate constant for BMAL-CLOCK/NPAS2 to Rev-erbs E-box                                     | Association      | -0.001 |
| Vt      | VPAC2R expression level                                                                                       | Production       | -0.001 |
| binc    | normalized binding rate constant for BMAL-CLOCK/NPAS2 to Cry2 E-box                                           | Association      | 0.001  |
| tlnp    | translation rate constant for NPAS2                                                                           | Production       | -0.001 |
| ne      | nuclear export rate constant for protein bound to PER                                                         | Translocation    | -0.001 |
| gcal    | maximum conductance of L-type calcium channels                                                                | Voltage Dynamics | 0.001  |
| nerev   | nuclear export rate constant for REV-ERBs as well as GSK3 $\beta$ if bound                                    | Translocation    | -0.001 |
| Gt      | total GSK3 $\beta$ concentration                                                                              | Phosphorylation  | 0.001  |
| agp     | binding rate constant for PER2 to GSK3 $\beta$                                                                | Phosphorylation  | 0      |
| c       | membrane capacitance                                                                                          | Voltage Dynamics | 0      |
| binr    | normalized binding rate constant for BMAL-CLOCK/NPAS2 to Rev-erbs E-box                                       | Association      | 0      |
| vs      | cAMP production rate (when VPAC2R bound by VIP & not inhibited by CRY)<br>(= activation rate of CREB by cAMP) | Coupling         | 0      |
| bin     | normalized binding rate constant for BMAL-CLOCK/NPAS2 to Per1/2/Cry1 E-box                                    | Association      | 0      |
| taurnl  | time constant of non-L-type calcium channels                                                                  | Calcium Dynamics | 0      |
| unvbin  | rate constant for VIP unbinding from VPAC2R                                                                   | Coupling         | 0      |
| bc      | basal release rate of cytosolic calcium                                                                       | Calcium Dynamics | 0      |
| gnaleak | sodium leak channel conductance                                                                               | Voltage Dynamics | 0      |
| vpr     | VIP release rate                                                                                              | Association      | 0      |
| gkca    | maximal conductance of calcium-dependent potassium channels                                                   | Voltage Dynamics | 0      |
| gkleak  | potassium leak channel conductance                                                                            | Voltage Dynamics | 0      |
| aR      | rate of GABA synaptic channel opening                                                                         | Voltage Dynamics | 0      |
| aD      | rate of GABA synaptic channel closing                                                                         | Voltage Dynamics | 0      |

### Supplementary Table 1

|       |                                                                      |                  |   |
|-------|----------------------------------------------------------------------|------------------|---|
| Tmax  | maximum released GABA neurotransmitter concentration                 | Voltage Dynamics | 0 |
| VT    | GABA synapse release threshold                                       | Voltage Dynamics | 0 |
| Kp    | GABA synapse release sensitivity                                     | Voltage Dynamics | 0 |
| Egaba | GABA synaptic current reversal potential                             | Voltage Dynamics | 0 |
| ggaba | maximum conductance of the GABA synaptic current                     | Voltage Dynamics | 0 |
| Iglut | strength of the current caused by glutamate input (irrelevant in DD) | Voltage Dynamics | 0 |

**\* Positive values occur when increasing the parameter value increases period.**

Highlighted parameters increase period from wild type to mPer2(Luc) with a <25% change from baseline
